# Supplementary material for: Understanding PSA and its derivatives in prediction of tumor volume: addressing health disparities in prostate cancer risk stratification
Source: PubMed Central journal article supplement (PMC5400546; doi:10.18632/oncotarget.14903), 2017-01-30
Supplement: oncotarget-08-20802-s001.pdf [file oncotarget-08-20802-s001.pdf]

## Understanding PSA and its derivatives in prediction of tumor volume: addressing health disparities in prostate cancer risk stratification

### SUPPLEMENTARY TABLES

Supplementary Table 1: General characteristics of men at different BMI categories

| Variable                      | Normal weight (BMI < 25) | Overweight (BMI 25-<30) | Obese (BMI ≥30) | p-value <sup>a</sup> |
|-------------------------------|--------------------------|-------------------------|-----------------|----------------------|
|                               | n=160                    | n=307                   | n=116           |                      |
|                               | Mean ± SD                | Mean ± SD               | Mean ± SD       |                      |
| BMI <sup>b</sup>              | 23.1 ± 1.56              | 27.5 ± 1.44             | 33.0 ± 2.64     | n/a                  |
| Patient height, m             | 1.78 ± 0.07              | 1.78 ± 0.07             | 1.78 ± 0.07     | 0.87                 |
| Prostate weight, gm           | 43.5 ± 15.4              | 49.7 ± 21.9             | 55.2 ± 20.8     | <0.001               |
| PSA, ng/mL                    | 4.5 ± 1.9                | 4.6 ± 2.0               | 4.7 ± 2.0       | 1.0                  |
| PSA mass, μg                  | 0.51 ± 0.21              | 0.56 ± 0.25             | 0.62 ± 0.27     | 0.01                 |
| PSA density, ng/mL/gm         | 0.11 ± 0.05              | 0.10 ± 0.05             | 0.09 ± 0.04     | 0.001                |
| PSA mass density, μg/gm       | 0.012 ± 0.01             | 0.012 ± 0.01            | 0.012 ± 0.01    | 0.60                 |
| Tumor volume, cm <sup>3</sup> | 0.65 ± 0.89              | 0.67 ± 0.88             | 0.84 ± 1.16     | 0.82                 |

<sup>a</sup> Kruskal-Wallis test was used in calculation of p-values.

<sup>b</sup> Six patients had missing BMI values and were excluded from this table.

**Supplementary Table 2: Comparison of clinical and pathological parameters in patients with insignificant tumor volume in different BMI categories dichotomized according to gland weight**

| Tumor volume <0.5 cm <sup>3</sup>   |                                |              |                             |                               |                               |              |                             |           |                   |                             |                             |        |        |
|-------------------------------------|--------------------------------|--------------|-----------------------------|-------------------------------|-------------------------------|--------------|-----------------------------|-----------|-------------------|-----------------------------|-----------------------------|--------|--------|
|                                     | Normal weight (BMI < 25), n=98 |              |                             |                               | Overweight (BMI 25-29), n=178 |              |                             |           | Obese (≥30), n=67 |                             |                             |        |        |
|                                     | <sup>a</sup> Median PW = 42.2  |              |                             | <sup>a</sup> Median PW = 49.1 |                               |              | <sup>a</sup> Median PW = 58 |           |                   | <i>p-value</i> <sup>b</sup> |                             |        |        |
|                                     | All (n=98)                     | < MPW (n=49) | ≥ MPW (n=49)                |                               | All (n=178)                   | < MPW (n=89) | ≥ MPW (n=89)                |           | All (n=67)        | < MPW (n=32)                | ≥ MPW (n=35)                |        |        |
|                                     | Mean ± SD                      | Mean ± SD    | <i>p-value</i> <sup>c</sup> | Mean ± SD                     | Mean ± SD                     | Mean ± SD    | <i>p-value</i> <sup>c</sup> | Mean ± SD | Mean ± SD         | Mean ± SD                   | <i>p-value</i> <sup>c</sup> |        |        |
| <i>BMI</i>                          | 23.1 ± 1.48                    | 23.0 ± 1.7   | 23.3 ± 1.3                  | 0.56                          | 27.5 ± 1.4                    | 27.5 ± 1.5   | 27.5 ± 1.3                  | 0.77      | 33.0 ± 2.7        | 33.1 ± 2.3                  | 32.8 ± 3.0                  | 0.28   | <0.001 |
| <i>Patient height, m</i>            | 1.78 ± 0.06                    | 1.77 ± 0.06  | 1.78 ± 0.1                  | 0.39                          | 1.78 ± 0.07                   | 1.78 ± 0.06  | 1.78 ± 0.07                 | 0.63      | 1.78 ± 0.07       | 1.78 ± 0.07                 | 1.76 ± 0.07                 | 0.40   | 0.78   |
| <i>Prostate weight, gm</i>          | 46.3 ± 1.75                    | 33.3 ± 6.37  | 59.3 ± 14.9                 | <0.001                        | 52.8 ± 21.3                   | 38.4 ± 7.3   | 67.3 ± 21.0                 | <0.001    | 62.2 ± 22.2       | 44.6 ± 8.0                  | 78.3 ± 18.5                 | <0.001 | <0.001 |
| <i>Tumor volume, cm<sup>3</sup></i> | 0.18 ± 0.13                    | 0.19 ± 0.1   | 0.18 ± 0.1                  | 0.6                           | 0.18 ± 0.2                    | 0.19 ± 0.2   | 0.16 ± 0.15                 | 0.37      | 0.18 ± 0.1        | 0.21 ± 0.15                 | 0.15 ± 0.1                  | 0.19   | 0.52   |
| <i>PSA, ng/mL</i>                   | 4.3 ± 1.98                     | 3.8 ± 1.8    | 4.8 ± 2.0                   | 0.03                          | 4.4 ± 2.1                     | 3.6 ± 1.9    | 5.1 ± 2.1                   | <0.001    | 4.7 ± 2.3         | 3.5 ± 1.2                   | 5.8 ± 2.4                   | <0.001 | 0.72   |
| <i>PSA mass, μg</i>                 | 0.48 ± 0.22                    | 0.42 ± 0.2   | 0.54 ± 0.2                  | 0.02                          | 0.53 ± 0.3                    | 0.44 ± 0.2   | 0.62 ± 0.3                  | <0.001    | 0.61 ± 0.3        | 0.46 ± 0.2                  | 0.74 ± 0.3                  | <0.001 | 0.03   |
| <i>PSA density, ng/mL/gm</i>        | 0.10 ± 0.05                    | 0.11 ± 0.1   | 0.08 ± 0.04                 | 0.003                         | 0.09 ± 0.05                   | 0.1 ± 0.1    | 0.08 ± 0.03                 | 0.08      | 0.08 ± 0.03       | 0.08 ± 0.03                 | 0.08 ± 0.03                 | 0.51   | 0.02   |
| <i>PSA mass density, μg/gm</i>      | 0.011 ± 0.01                   | 0.013 ± 0.01 | 0.009 ± 0.004               | 0.002                         | 0.011 ± 0.01                  | 0.012 ± 0.01 | 0.01 ± 0.004                | 0.10      | 0.009 ± 0.003     | 0.01 ± 0.003                | 0.009 ± 0.004               | 0.32   | 0.52   |
| <i>PSA density &gt; 0.15</i>        | 14/98 (14%)                    | 12/49        | 2/49                        | 0.01                          | 20/178 (11%)                  | 17/87        | 3/91                        | 0.001     | 0/67 (0%)         | 0/32                        | 0/35                        | n/a    | 0.01   |
| <i>PSA mass density &gt; 0.012</i>  | 40/98 (41%)                    | 29/49        | 11/49                       | <0.001                        | 60/178 (34%)                  | 35/87        | 25/91                       | 0.10      | 25/67 (36%)       | 12/32                       | 13/35                       | 0.99   | 0.50   |

Abbreviations: BMI = body mass index; PW = prostate weight; MPW = median prostate weight.

<sup>a</sup> prostates are dichotomized at a threshold of median prostate weight at each BMI category.

<sup>b</sup> *p*-value applicable to general column (Kruskal-Wallis test for continuous and Fisher test for categorical variables).

<sup>c</sup> *p*-value comparing distribution of findings in each BMI category.

Wilcoxon-Mann-Whitney rank sum test (U test) was used for comparison of 2 sets of data.

**Supplementary Table 3: Comparison of clinical and pathological parameters in patients with significant tumor volume in different BMI categories dichotomized according to gland weight**

|                                                      | Tumor volume $\geq 0.5 \text{ cm}^3$ |                   |                   |                             |                               |                   |                   |                             |                               |                   |                   |                             | <i>p-value</i> <sup>b</sup> |
|------------------------------------------------------|--------------------------------------|-------------------|-------------------|-----------------------------|-------------------------------|-------------------|-------------------|-----------------------------|-------------------------------|-------------------|-------------------|-----------------------------|-----------------------------|
|                                                      | Normal weight (BMI < 25), n=62       |                   |                   |                             | Overweight (BMI 25-29), n=127 |                   |                   |                             | Obese ( $\geq 30$ ), n=49     |                   |                   |                             |                             |
|                                                      | <sup>a</sup> Median PW = 38.6        |                   |                   |                             | <sup>a</sup> Median PW = 40.2 |                   |                   |                             | <sup>a</sup> Median PW = 42.0 |                   |                   |                             |                             |
|                                                      | All (n=62)                           | < MPW (n=31)      | $\geq$ MPW (n=31) | <i>p-value</i> <sup>c</sup> | All (n=127)                   | < MPW (n=64)      | $\geq$ MPW (n=63) | <i>p-value</i> <sup>c</sup> | All (n=49)                    | < MPW (n=24)      | $\geq$ MPW (n=25) | <i>p-value</i> <sup>c</sup> |                             |
|                                                      | Mean $\pm$ SD                        | Mean $\pm$ SD     |                   | Mean $\pm$ SD               | Mean $\pm$ SD                 |                   | Mean $\pm$ SD     | Mean $\pm$ SD               |                               | Mean $\pm$ SD     | Mean $\pm$ SD     |                             |                             |
| <i>BMI</i>                                           | 22.9 $\pm$ 1.7                       | 22.8 $\pm$ 1.6    | 23.1 $\pm$ 1.8    | 0.31                        | 27.5 $\pm$ 1.5                | 27.2 $\pm$ 1.4    | 27.8 $\pm$ 1.5    | 0.06                        | 33.0 $\pm$ 2.6                | 32.9 $\pm$ 3.2    | 33.0 $\pm$ 2.1    | 0.29                        | <0.001                      |
| <i>Patient height, m</i>                             | 1.78 $\pm$ 0.08                      | 1.76 $\pm$ 0.07   | 1.80 $\pm$ 0.08   | 0.07                        | 1.78 $\pm$ 0.1                | 1.77 $\pm$ 0.07   | 1.80 $\pm$ 0.07   | 0.10                        | 1.80 $\pm$ 0.1                | 1.79 $\pm$ 0.1    | 1.80 $\pm$ 0.05   | 0.63                        | 0.41                        |
| <i>Prostate weight, gm</i>                           | 39.2 $\pm$ 10.5                      | 30.6 $\pm$ 4.5    | 47.7 $\pm$ 7.4    | <0.001                      | 45.3 $\pm$ 22.1               | 31.9 $\pm$ 5.1    | 58.9 $\pm$ 24.3   | <0.001                      | 45.7 $\pm$ 14.2               | 35.2 $\pm$ 5.0    | 56.2 $\pm$ 12.5   | <0.001                      | 0.06                        |
| <i>Tumor volume, cm<sup>3</sup></i>                  | 1.38 $\pm$ 1.1                       | 1.36 $\pm$ 0.8    | 1.41 $\pm$ 1.3    | 0.67                        | 1.37 $\pm$ 1.0                | 1.41 $\pm$ 1.1    | 1.3 $\pm$ 0.9     | 0.70                        | 1.73 $\pm$ 1.3                | 1.54 $\pm$ 1.0    | 1.92 $\pm$ 1.6    | 0.60                        | 0.45                        |
| <i>PSA, ng/mL</i>                                    | 4.9 $\pm$ 1.6                        | 4.3 $\pm$ 1.4     | 5.5 $\pm$ 1.6     | 0.01                        | 5.0 $\pm$ 1.8                 | 4.6 $\pm$ 1.8     | 5.3 $\pm$ 1.7     | 0.02                        | 4.7 $\pm$ 1.5                 | 4.3 $\pm$ 1.5     | 5.0 $\pm$ 1.4     | 0.03                        | 0.60                        |
| <i>PSA mass, <math>\mu\text{g}</math></i>            | 0.55 $\pm$ 0.18                      | 0.47 $\pm$ 0.2    | 0.63 $\pm$ 0.2    | 0.001                       | 0.6 $\pm$ 0.2                 | 0.56 $\pm$ 0.2    | 0.65 $\pm$ 0.2    | 0.01                        | 0.64 $\pm$ 0.3                | 0.55 $\pm$ 0.2    | 0.67 $\pm$ 0.2    | 0.03                        | 0.29                        |
| <i>PSA density, ng/mL/gm</i>                         | 0.13 $\pm$ 0.04                      | 0.14 $\pm$ 0.05   | 0.12 $\pm$ 0.03   | 0.02                        | 0.12 $\pm$ 0.05               | 0.15 $\pm$ 0.05   | 0.1 $\pm$ 0.04    | <0.001                      | 0.11 $\pm$ 0.04               | 0.12 $\pm$ 0.04   | 0.09 $\pm$ 0.03   | 0.02                        | 0.02                        |
| <i>PSA mass density, <math>\mu\text{g/gm}</math></i> | 0.014 $\pm$ 0.004                    | 0.016 $\pm$ 0.005 | 0.013 $\pm$ 0.003 | 0.04                        | 0.015 $\pm$ 0.006             | 0.018 $\pm$ 0.006 | 0.012 $\pm$ 0.005 | <0.001                      | 0.015 $\pm$ 0.008             | 0.016 $\pm$ 0.005 | 0.012 $\pm$ 0.004 | 0.02                        | 0.86                        |
| <i>PSA density &gt; 0.15</i>                         | 19/62 (31%)                          | 14/31             | 5/31              | 0.03                        | 32/127 (25%)                  | 25/63             | 7/64              | <0.001                      | 6/49 (0.1%)                   | 5/24              | 1/25              | 0.17                        | 0.07                        |
| <i>PSA mass density &gt; 0.012</i>                   | 44/62 (71%)                          | 23/31             | 21/31             | 0.78                        | 80/127 (63%)                  | 52/63             | 28/64             | 0.10                        | 33/49 (67%)                   | 19/24             | 14/25             | 0.15                        | 0.54                        |

Abbreviations: BMI = body mass index; PW = prostate weight; MPW = median prostate weight.

<sup>a</sup> prostates are dichotomized at a threshold of median prostate weight at each BMI category.

<sup>b</sup> p-value applicable to general column (Kruskal-Wallis test for continuous and Fisher test for categorical variables).

<sup>c</sup> p-value comparing distribution of findings in each BMI category.

Wilcoxon-Mann-Whitney rank sum test (U test) was used for comparison of 2 sets of data.

**Supplementary Table 4: Univariable linear regression models to examine PSA derivatives in predicting for total tumor volume within racial/ethnic groups**

| Variable                                      | <i>All (n=589)</i> |                | <i>NHW (n=390)</i> |                | <i>NHB (n=87)</i> |                | <i>Hispanic/Latino (n=78)</i> |                | <i>Other (n=34)</i> |                |
|-----------------------------------------------|--------------------|----------------|--------------------|----------------|-------------------|----------------|-------------------------------|----------------|---------------------|----------------|
|                                               | R-square           | <i>p-value</i> | R-square           | <i>p-value</i> | R-square          | <i>p-value</i> | R-square                      | <i>p-value</i> | R-square            | <i>p-value</i> |
| <i>PSA, ng/mL</i>                             | 0.030              | <0.001         | 0.018              | 0.01           | 0.027             | 0.08           | 0.078                         | 0.01           | 0.022               | 0.40           |
| <i>PSA density, ng/mL/gm</i>                  | 0.098              | <0.001         | 0.090              | <0.001         | 0.152             | <0.001         | 0.176                         | <0.001         | 0.148               | 0.03           |
| <i>PSA mass, <math>\mu</math>g</i>            | 0.032              | <0.001         | 0.021              | 0.003          | 0.030             | 0.06           | 0.080                         | 0.01           | 0.016               | 0.48           |
| <i>PSA mass density, <math>\mu</math>g/gm</i> | 0.107              | <0.001         | 0.099              | <0.001         | 0.164             | <0.001         | 0.187                         | <0.001         | 0.148               | 0.03           |

Abbreviations: NHW = Non-Hispanic White; NHB = Non-Hispanic Black.

R-square denotes a goodness-of-fit measure of linear regression model. P-value is reported for regression coefficient of PSA and its derivatives. These results are based on linear regression models using log-transformed total tumor volume and PSA and its derivatives.

Supplementary Table 5: Analysis of correlation between tumor volume of prostate cancer and PSA and its derivatives

| Variable                | <i>All</i> <sup>a</sup> |                | <i>All</i> <sup>b</sup> | <i>Non-Hispanic White</i> <sup>b</sup> | <i>Non-Hispanic Black</i> <sup>b</sup> | <i>Hispanic/Latino</i> <sup>b</sup> | <i>Other</i> <sup>b</sup> |
|-------------------------|-------------------------|----------------|-------------------------|----------------------------------------|----------------------------------------|-------------------------------------|---------------------------|
|                         | r                       | <i>p-value</i> | r                       | r                                      | r                                      | r                                   | r                         |
| <i>PSA, ng/mL</i>       | 0.172                   | <0.001         | 0.177                   | 0.142                                  | 0.194                                  | 0.300                               | 0.194                     |
| <i>PSA density</i>      | 0.319                   | <0.001         | 0.316                   | 0.303                                  | 0.402                                  | 0.432                               | 0.184                     |
| <i>PSA mass</i>         | 0.178                   | <0.001         | 0.182                   | 0.152                                  | 0.204                                  | 0.303                               | 0.192                     |
| <i>PSA mass density</i> | 0.334                   | <0.001         | 0.330                   | 0.318                                  | 0.417                                  | 0.445                               | 0.188                     |

Abbreviations: r = Pearson's correlation coefficient.

<sup>a</sup> Partial correlation coefficient with adjustment of age.

<sup>b</sup> Unadjusted correlation coefficient using log-transformed value.

**Supplementary Table 6: Multivariable analysis of PSA derivatives prediction of tumor volume at radical prostatectomy**

| <b>Variable</b>         | <b>R-square</b> | <b><i>p</i>-value</b> |
|-------------------------|-----------------|-----------------------|
| <i>PSA, ng/mL</i>       | 0.035           | <0.001                |
| <i>PSA density</i>      | 0.115           | <0.001                |
| <i>PSA mass</i>         | 0.037           | <0.001                |
| <i>PSA mass density</i> | 0.125           | <0.001                |

\*Age was included in the model for the adjustment.

R-square denotes a goodness-of-fit measure of linear regression model. p-value is reported for regression coefficient of PSA and its derivatives. These results are based on linear regression models using log-transformed total tumor volume and PSA and its derivatives.
